CORRECTION

# Correction: Weather Regulates Location, Timing, and Intensity of Dengue Virus Transmission between Humans and Mosquitoes

The *PLOS Neglected Tropical Diseases* Staff

The date this article was received is listed incorrectly. The correct date received is the following: February 9, 2015.

## Reference

1. Campbell KM, Haldeman K, Lehnig C, Munayco CV, Halsey ES, Laguna-Torres VA, et al. (2015) Weather Regulates Location, Timing, and Intensity of Dengue Virus Transmission between Humans and Mosquitoes. *PLoS Negl Trop Dis* 9(7): e0003957. doi:[10.1371/journal.pntd.0003957](https://doi.org/10.1371/journal.pntd.0003957) PMID: [26222979](https://pubmed.ncbi.nlm.nih.gov/26222979/)

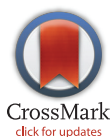

## OPEN ACCESS

**Citation:** The *PLOS Neglected Tropical Diseases* Staff (2015) Correction: Weather Regulates Location, Timing, and Intensity of Dengue Virus Transmission between Humans and Mosquitoes. *PLoS Negl Trop Dis* 9(9): e0004047. doi:[10.1371/journal.pntd.0004047](https://doi.org/10.1371/journal.pntd.0004047)

**Published:** September 17, 2015

**Copyright:** © 2015 The PLOS Neglected Tropical Diseases Staff. This is an open access article distributed under the terms of the [Creative Commons Attribution License](https://creativecommons.org/licenses/by/4.0/), which permits unrestricted use, distribution, and reproduction in any medium, provided the original author and source are credited.
